# Supplementary material for: Highly active electrocatalysts of iron phthalocyanine by MOFs for oxygen reduction reaction under alkaline solution
Source: Royal Society of Chemistry journal article supplement (doi:10.1039/d0ra03468a), 2020-01-01
Supplement: d0ra03468a1.pdf [file d0ra03468a1.pdf]

## Supporting information

### Highly Active Electrocatalysts of Iron Phthalocyanine by MOFs for Oxygen Reduction Reaction under Alkaline Solution

Cheng Cheng Wang<sup>a,1</sup>, Bingxue Hou<sup>b,1</sup>, Shuxian Yuan<sup>a</sup>, Qi Zhang<sup>c</sup>, Xumei

Cui<sup>d,\*</sup>, Xintao Wang<sup>a,\*\*</sup>

<sup>a</sup>*Shen Zhen Polytechnic, Shenzhen, 518055, China*

<sup>b</sup>*Aviation Engineering Institute, Civil Aviation Flight University of China,  
GuangHan, 618037, China*

<sup>c</sup>*Panzhuhua University, Panzhuhua, 617000, China*

<sup>d</sup>*School of Optoelectronic Technology, Chengdu University of Information  
Technology, Chengdu, 610225, China.*

<sup>1</sup>*The authors are making the same contribution to this paper.*

[\*] Corresponding Author:

[wangchengcheng@szpt.edu.cn](mailto:wangchengcheng@szpt.edu.cn) ( Dr. Chengcheng Wang)

[wangxintao@szpt.edu.cn](mailto:wangxintao@szpt.edu.cn) ( Xintao Wang)

**Figure S1.** Full XPS spectrum of Fe<sub>20</sub>-N/C samples fired at 800 °C, 900 °C 1000 °C  
(a), Fe<sub>15</sub>-N/C and Fe<sub>25</sub>-N/C samples fired at 900 °C (b).

**Figure S2.** High resolution C1s XPS spectra of Fe<sub>20</sub>-N/C samples fired at 800 °C (a), 900 °C (b) and 1000 °C (c), The relative content ratio of C-N bonds in all C species (C-N bonds in all C species (C-N, C-C, and C=O) of the catalysts (d).

**Figure S3.** High resolution C1s XPS spectra of Fe15-N/C (a) and Fe25-N/C (b) samples fired at 900 °C. The relative content ratio of C-N bonds in all C species (C N bonds in all C species (C-N, C-C, and C=O) of the catalysts (c).

**Figure S4.** Fe2p XPS spectra of Fe20-N/C samples fired at 800 °C , 900 °C and 1000 °C (a) , Fe15-N/C and Fe25-N/C samples fired at 900 °C (b).

**Figure S5.** Corresponding Koutecky-Levich (K-L) plots derived from the LSV results on catalysts of Fe<sub>20</sub>-N/C samples fired at 800 °C, 900 °C, 1000 °C for 3 h and commercial Pt/C. The loading of catalysts was 0.38 mg/cm<sup>2</sup>.
